# Supplementary material for: Dual effect of chitosan-based nanoparticles on the inhibition of β-amyloid peptide aggregation and disintegration of the preformed fibrils
Source: Royal Society of Chemistry journal article supplement (doi:10.1039/c9tb00162j), 2019-01-01

## Supporting Information for

### **Dual Effect of Chitosan-based Nanoparticles on the Inhibition of $\beta$ -Amyloid Peptide Aggregation and Disintegration of the Preformed Fibrils**

Anjali Jha\*, Vandana Ghormade, Henry Kolge, Kishore M. Paknikar\*

Nanobioscience Group, Agharkar Research Institute, G.G. Agarkar road, Pune 411004, India

\*To whom correspondence should be addressed.

E-mail: [kpaknikar@gmail.com](mailto:kpaknikar@gmail.com)

[anjali\\_jha@aripune.org](mailto:anjali_jha@aripune.org)

## Supplementary text

### Supplementary Figure legends

Figure S1. Characterization of A $\beta$ 1-42 peptide and nanoparticles mixture. Panel A shows SEM image of ordered pre-fibrillar amyloid aggregates formed when A $\beta$ 1-42 peptide (225  $\mu$ g/ml) incubated alone at 37 °C for 24 h. Panel B & C show SEM images of peptides pre-incubated at 37 °C for 24 h with chitosan and chitosan-PLGA nanoparticles, respectively. The final concentration of nanoparticles were kept 20  $\mu$ g/ml. Panel D shows UV-Visible absorbance spectra of these three samples.

Figure S1

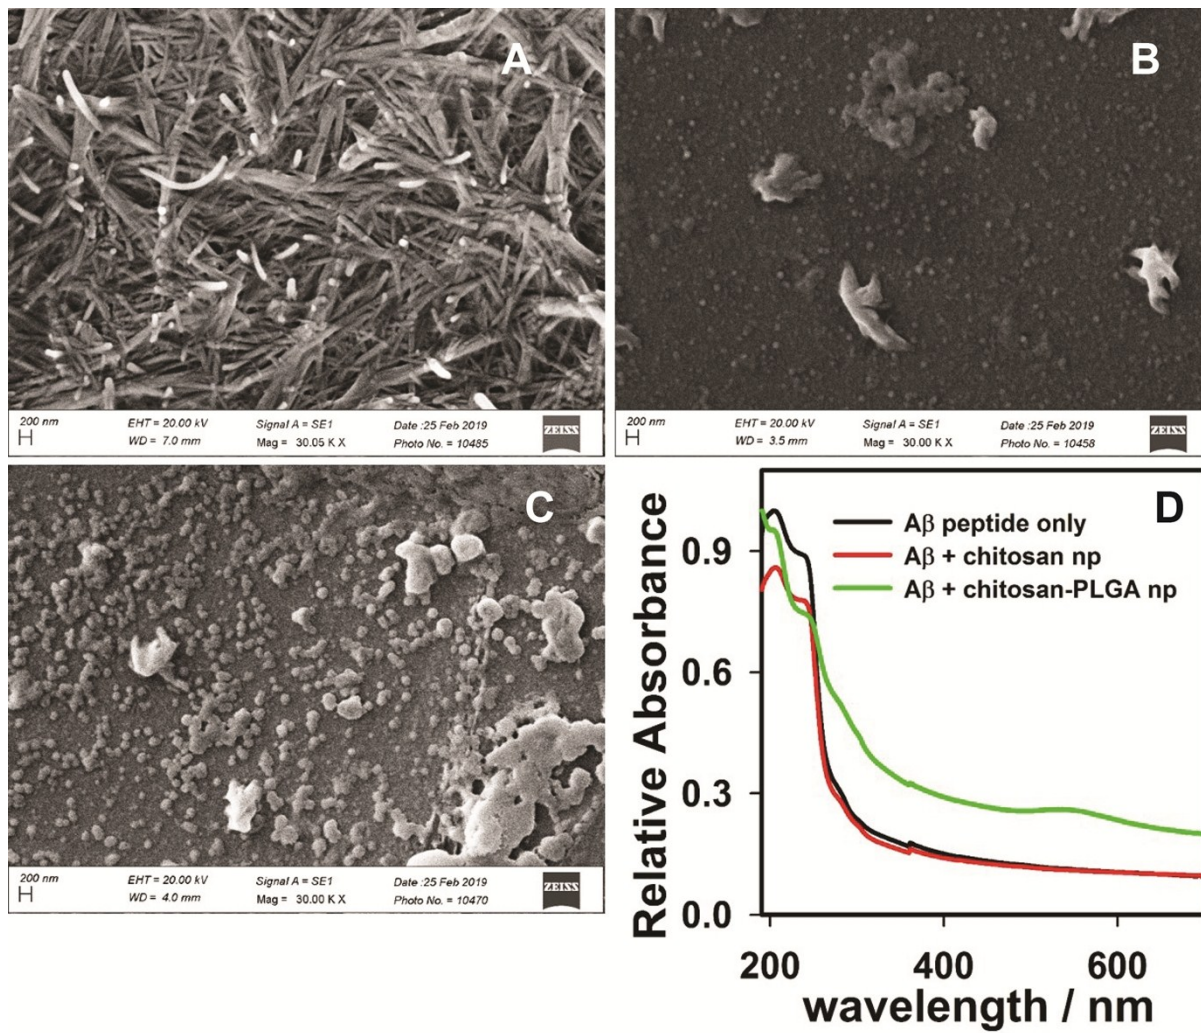

Supplement: c9tb00162j1.pdf [file c9tb00162j1.pdf]
